# Supplementary material for: β-Aminobutyric Acid Priming Acquisition and Defense Response of Mango Fruit to Colletotrichum gloeosporioides Infection Based on Quantitative Proteomics
Source: PubMed Central journal article supplement (PMC6770319; doi:10.3390/cells8091029), 2019-09-04
Supplement: cells-08-01029-s001.pdf [file cells-08-01029-s001.pdf]

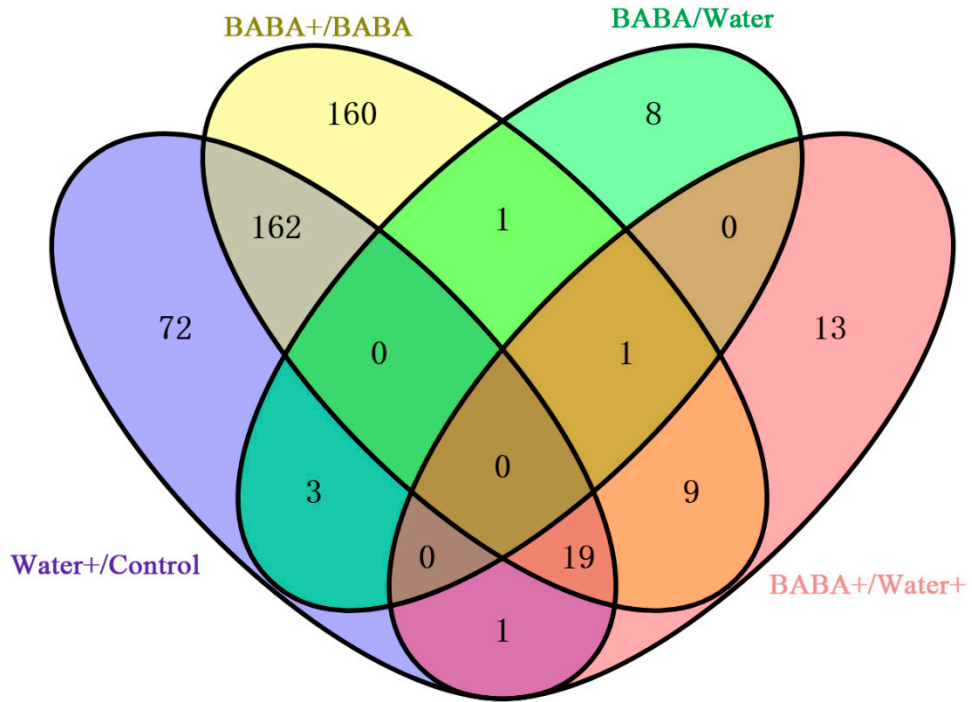

Figure S1

Venn diagrams showing the number of differentially regulated proteins in mango fruit after 4 days of storage.

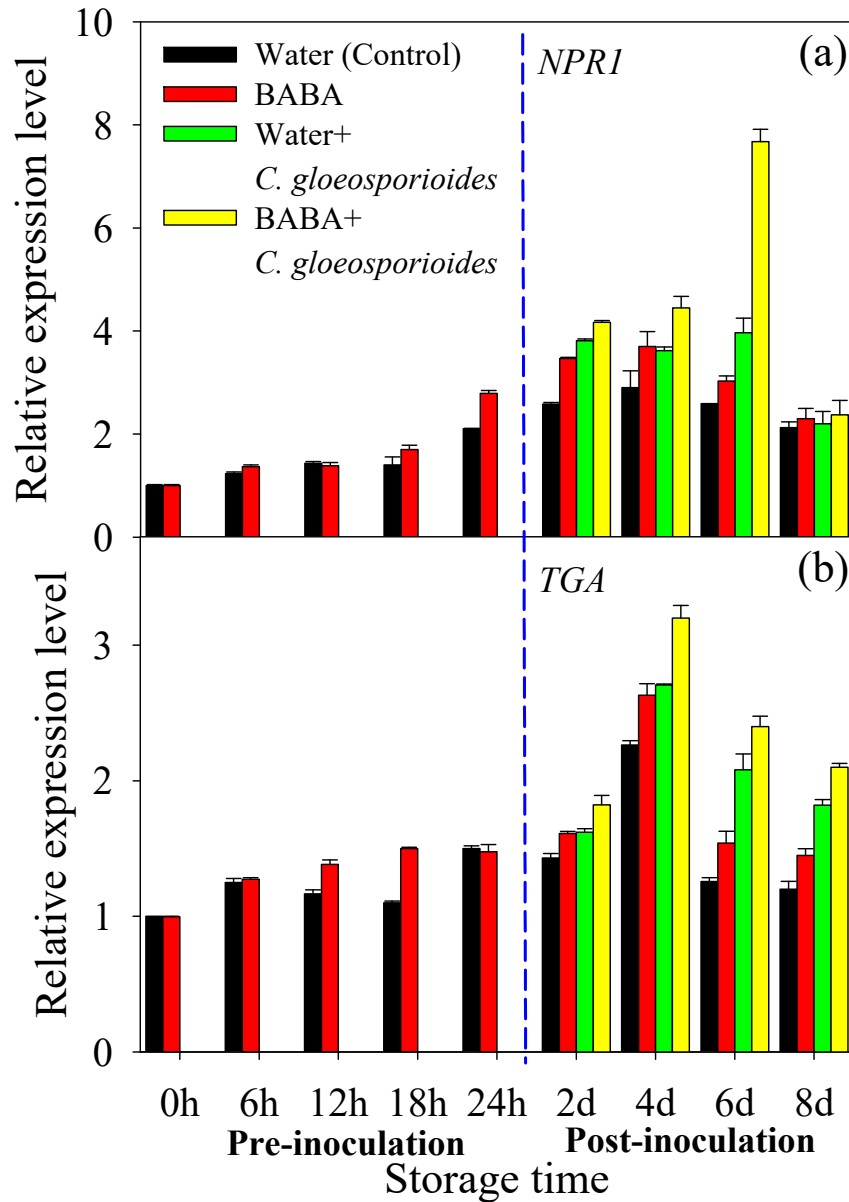

Figure S2

Gene expression level of SA signaling related genes.

Table S1. Primer sequences of the selected genes for qRT-PCR.

| Gene name     | Unigene ID        | Forward primer (5'→3')   | Reverse primer (5'→3')  |
|---------------|-------------------|--------------------------|-------------------------|
| <i>MiMLP</i>  | TRINITY_DN73690_c | ATCTGGCTCTGTCATCTGCTGGAA | TTGGCTCTGGAACCTCCTCACTC |
|               | 2_g2_m.34754      |                          |                         |
| <i>MiPR-4</i> | TRINITY_DN59793_c | GACTTGCTGGCTGTGAGTGCTT   | TGTGCTCCTGTCGCTGTGTTTG  |
|               | 0_g1_m.27015      |                          |                         |
| <i>MiTLP1</i> | TRINITY_DN8225_c0 | TTGTTGAGTTCACACTGGCGGAAA | TCTCGGCAGAGTCCTTACCAC   |
|               | _g2_m.42771       |                          |                         |
| <i>MiHDA5</i> | TRINITY_DN90601_c | GCCACAAAGTCTGCCACTTGGAGA | TGCCTCCACCTGTCCACCTTGA  |
|               | 5_g11_m.61123     | T                        |                         |

|                |                                    |                          |                               |
|----------------|------------------------------------|--------------------------|-------------------------------|
| <i>MiCHI1</i>  | TRINITY_DN17497_c<br>0_g1_m.12170  | GGTGGTGGTTCAGTTGCCAGTATT | AATGCAGCAATCTCACGCTTGGA       |
| <i>Mi4CL7</i>  | TRINITY_DN79018_c<br>0_g1_m.39121  | GAGGCAATACTCTGGTGGCAATGG | AGCAAGCACAATTGGAGGCACA<br>A   |
| <i>MiCAD1</i>  | TRINITY_DN73359_c<br>0_g1_m.34547  | TGGTCAGCTCGGATGCAACTCA   | AGAGGGTGAAACACAGGCACAG<br>TA  |
| <i>MiCCR</i>   | TRINITY_DN17449_c<br>0_g1_m.12150  | TGAGACTTCGTGGACTGACCTTGA | AACACAGCACAGCTCGCATTCA        |
| <i>MiPOD</i>   | TRINITY_DN72550_c<br>0_g1_m.33984  | CGACGGTGTGTGGTGGTGGGA    | AACGCCAGTGTCTCCTTACCTT        |
| <i>MinsLTP</i> | TRINITY_DN107403_c<br>c0_g1_m.1949 | GCTCTTGCCATTAAGTCCGGTCA  | AGCAGCAGCGTTAGAGTTCAATC<br>C  |
| <i>MiTRX-F</i> | TRINITY_DN60144_c<br>1_g1_m.27160  | TCGTCAGCACTGTCTCTCCATC   | TCTTGTACCCGGCGGCGTTA          |
| <i>MiGPX2</i>  | TRINITY_DN53600_c<br>0_g2_m.24082  | AGCGATTTGAAGTGGGTGTTTGGT | ATTGTGTAGCAGTACAGCGGGAT<br>TG |
| <i>MiGS</i>    | TRINITY_DN69464_c<br>0_g1_m.32085  | GGTGGCTAATCGTGGTTGCTCAA  | GACGCCGATCCTCCAAGTAACCT       |
| <i>MiDRP</i>   | TRINITY_DN71326_c<br>0_g1_m.33275  | ATCTTATCGGCGGATGCAGACTCT | CCAGGCTTGTGTTTCATCACCAGTT     |
| <i>MiVPE</i>   | TRINITY_DN82192_c<br>1_g1_m.42683  | TCTATGCAACCACAGCGGCTAATG | TGTCACTGTCTCCATCCAAGCA        |
| <i>MiZDS</i>   | TRINITY_DN67292_c<br>0_g1_m.30843  | TAGTTGGCGTGCCTGTTGTCACA  | GCTTGCCTCAGTTGCCTTGATCG       |
| <i>MiENO</i>   | TRINITY_DN87366_c<br>0_g1_m.51370  | TCGTCCAAGGTCAAGTCCGTGAAG | CACACTCTGTGCGCCGTCTCTGA       |
| <i>MiMDH</i>   | TRINITY_DN88557_c<br>0_g3_m.54333  | GCACTGGATGGAGACGAGGATGT  | CCCTGGAGGTCAGCCGAAATCAA       |
| <i>MiHY5</i>   | TRINITY_DN69400_c<br>0_g1_m.32045  | TGATAGCGGTTTCAGTGGCAGGT  | GCAACGTGGACAGTCTCTCTTCA<br>A  |
| <i>MiNPR1</i>  | TRINITY_DN74852_c<br>1_g1          | CCAAGTCACCTCTTCATCCT     | TCACTCTTCTTCACTCCCC           |
| <i>MiTGA</i>   | TRINITY_DN70326_c<br>0_g1          | TCCAGCCGAGAAGGTCAA       | CGGAGCCGCCATTTATTT            |
| <i>MiACTIN</i> |                                    | ATCTGCTGGAAGGTGCTGAG     | CCAAGCAGCATGAAGATCAA          |

Table S2. Some proteins that were differentially regulated at 18 h.

| Protein ID                                                                                   | B18h/CK0<br>ratio | Description                              |
|----------------------------------------------------------------------------------------------|-------------------|------------------------------------------|
| <b>Proteins that were regulated only by BABA priming compared to Water treatment at 18 h</b> |                   |                                          |
| TRINITY_DN116612_c0_g1_m.4628                                                                | 0.76              | 18.1 kDa class I heat shock protein-like |

|                                |       |                                                       |
|--------------------------------|-------|-------------------------------------------------------|
| TRINITY_DN131088_c1_g1_m.8687  | 1.307 | photosystem I reaction center subunit N               |
| TRINITY_DN42895_c0_g3_m.20036  | 0.76  | ribulose biphosphate carboxylase/oxygenase activase 2 |
| TRINITY_DN64071_c0_g2_m.29098  | 1.418 | glucan endo-1,3-beta-glucosidase 7                    |
| TRINITY_DN67665_c1_g1_m.31054  | 1.301 | uncharacterized protein                               |
| TRINITY_DN74169_c0_g1_m.35014  | 0.752 | transmembrane protein 230-like                        |
| TRINITY_DN75525_c0_g1_m.36061  | 1.302 | cathepsin B isoform X2                                |
| TRINITY_DN81561_c2_g3_m.41820  | 0.76  | mitogen-activated protein kinase 1                    |
| TRINITY_DN85889_c1_g9_m.48371  | 0.744 | photosystem I assembly protein Ycf4                   |
| TRINITY_DN87220_c1_g1_m.51059  | 0.761 | pyruvate kinase isozyme G                             |
| TRINITY_DN88423_c0_g1_m.53963  | 0.744 | putative clathrin assembly protein                    |
| TRINITY_DN88581_c2_g1_m.54400  | 0.755 | heat shock protein 90-5                               |
| TRINITY_DN89300_c2_g1_m.56455  | 0.738 | callose synthase 10                                   |
| TRINITY_DN89756_c0_g10_m.57865 | 0.73  | translational activator GCN1                          |
| TRINITY_DN89797_c0_g1_m.58077  | 0.754 | kinesin-like protein KCA2 isoform X1                  |
| TRINITY_DN89974_c0_g2_m.58652  | 0.726 | vam6/Vps39-like protein                               |
| TRINITY_DN90262_c1_g2_m.59684  | 0.696 | UDP-glycosyltransferase 708A6-like                    |
| TRINITY_DN90262_c1_g5_m.59687  | 0.732 | UDP-glycosyltransferase 708A6-like                    |
| TRINITY_DN90321_c1_g3_m.59938  | 0.69  | eukaryotic translation initiation factor 3 subunit A  |
| TRINITY_DN90623_c4_g1_m.61204  | 0.695 | argonaute family protein                              |
| TRINITY_DN90779_c8_g5_m.62089  | 0.764 | E3 ubiquitin-protein ligase UPL1-like                 |
| TRINITY_DN99185_c0_g1_m.64726  | 1.739 | non-specific lipid-transfer protein 1                 |
| TRINITY_DN87915_c2_g6_m.52673  | 0.747 | geranylgeranyl transferase type-2 subunit beta-like   |

---

**Proteins that were regulated in primed fruit relative to non-primed fruit at 18h**

---

| Protein ID                    | B18h/CK18h ratio | Description                             |
|-------------------------------|------------------|-----------------------------------------|
| TRINITY_DN17497_c0_g1_m.12170 | 0.609            | chitinase CHI1 precursor                |
| TRINITY_DN65762_c0_g1_m.30030 | 0.717            | miraculin                               |
| TRINITY_DN72717_c1_g1_m.34085 | 0.713            | pathogenesis-related protein STH-2-like |
| TRINITY_DN76531_c0_g1_m.36902 | 0.694            | chalcone synthase 1-like                |
| TRINITY_DN87189_c1_g2_m.50995 | 0.727            | naringenin,2-oxoglutarate 3-dioxygenase |

---

Table S3. Some proteins that were differentially regulated at 4 d.

| Protein ID                                                                                                                              | BABA+/BAB<br>A Ratio | Description                                                                |
|-----------------------------------------------------------------------------------------------------------------------------------------|----------------------|----------------------------------------------------------------------------|
| <b>Proteins that were specifically differentially regulated in BABA-primed fruit in response to <i>C. gloeosporioides</i> infection</b> |                      |                                                                            |
| TRINITY_DN80823_c2_g1_m.41049                                                                                                           | 6.117                | carbonic anhydrase 2-like                                                  |
| TRINITY_DN69400_c0_g1_m.32045                                                                                                           | 3.082                | transcription factor HY5-like                                              |
| TRINITY_DN53391_c0_g1_m.23987                                                                                                           | 2.33                 | biotin carboxyl carrier protein of acetyl-CoA carboxylase 2                |
| TRINITY_DN86466_c0_g2_m.49486                                                                                                           | 2.078                | fatty-acid-binding protein 3                                               |
| TRINITY_DN82540_c1_g1_m.43139                                                                                                           | 2.057                | SEC14 cytosolic factor-like                                                |
| TRINITY_DN89949_c2_g1_m.58577                                                                                                           | 1.998                | acyltransferase-like protein At1g54570, chloroplastic isoform X2           |
| TRINITY_DN90086_c7_g1_m.59058                                                                                                           | 1.974                | putative G3BP-like protein isoform X1                                      |
| TRINITY_DN83008_c0_g6_m.43757                                                                                                           | 1.824                | pyruvate kinase isozyme A dihydrolipoyllysine-residue                      |
| TRINITY_DN88098_c1_g4_m.53100                                                                                                           | 1.75                 | acetyltransferase component 4 of pyruvate dehydrogenase complex            |
| TRINITY_DN91273_c0_g1_m.62609                                                                                                           | 1.675                | 6-phosphogluconate dehydrogenase, decarboxylating 1                        |
| TRINITY_DN69843_c0_g1_m.32338                                                                                                           | 1.654                | fatty-acid-binding protein                                                 |
| TRINITY_DN87325_c0_g1_m.51284                                                                                                           | 1.646                | transmembrane protein 214-B                                                |
| TRINITY_DN73299_c0_g1_m.34485                                                                                                           | 1.619                | uncharacterized protein LOC107174442                                       |
| TRINITY_DN89679_c5_g1_m.57608                                                                                                           | 1.608                | crocetin glucosyltransferase                                               |
| TRINITY_DN88541_c3_g1_m.54291                                                                                                           | 1.593                | probable ADP-ribosylation factor GTPase-activating protein AGD5 isoform X2 |
| TRINITY_DN80053_c0_g3_m.40207                                                                                                           | 1.561                | cysteine proteinase 15A                                                    |
| TRINITY_DN9041_c0_g1_m.60333                                                                                                            | 1.548                | transaldolase                                                              |
| TRINITY_DN46934_c0_g1_m.21588                                                                                                           | 1.539                | dual specificity phosphatase Cdc25                                         |
| TRINITY_DN113129_c0_g1_m.3616                                                                                                           | 1.495                | uncharacterized protein At2g17340-like isoform X3                          |
| TRINITY_DN107403_c0_g1_m.1949                                                                                                           | 1.493                | non-specific lipid-transfer protein 1-like                                 |
| TRINITY_DN90491_c0_g13_m.60622                                                                                                          | 1.491                | magnesium-chelatase subunit ChlH                                           |
| TRINITY_DN71326_c0_g1_m.33275                                                                                                           | 1.49                 | desiccation-related protein PCC13-62                                       |
| TRINITY_DN83849_c0_g1_m.44914                                                                                                           | 1.489                | D-aminoacyl-tRNA deacylase                                                 |
| TRINITY_DN56796_c2_g1_m.25585                                                                                                           | 1.483                | peroxiredoxin-2E, chloroplastic                                            |
| TRINITY_DN71257_c1_g1_m.33234                                                                                                           | 1.479                | ENOYL-ACP REDUCTASE 1 family protein                                       |
| TRINITY_DN66783_c1_g1_m.30557                                                                                                           | 1.478                | cytochrome b5                                                              |
| TRINITY_DN18181_c0_g1_m.12323                                                                                                           | 1.47                 | desumoylating isopeptidase 1                                               |
| TRINITY_DN83938_c0_g1_m.45088                                                                                                           | 1.469                | ferredoxin--NADP reductase                                                 |
| TRINITY_DN86978_c0_g2_m.50492                                                                                                           | 1.463                | glycosyl transferase family 2 family protein                               |

|                                |       |                                                                 |
|--------------------------------|-------|-----------------------------------------------------------------|
| TRINITY_DN89096_c0_g11_m.55908 | 1.457 | peroxisomal (S)-2-hydroxy-acid oxidase-like                     |
| TRINITY_DN42853_c1_g1_m.20002  | 1.45  | copper transport protein ATX1-like                              |
| TRINITY_DN84180_c10_g1_m.45434 | 1.448 | 3-hydroxyacyl-[acyl-carrier-protein] dehydratase FabZ-like      |
| TRINITY_DN78900_c2_g1_m.39002  | 1.443 | eukaryotic peptide chain release factor subunit 1-3             |
| TRINITY_DN85387_c0_g1_m.47412  | 1.443 | phytoene synthase                                               |
| TRINITY_DN88428_c0_g1_m.53975  | 1.436 | probable glutamyl endopeptidase, chloroplastic isoform X2       |
| TRINITY_DN82192_c1_g1_m.42683  | 1.433 | vacuolar-processing enzyme-like                                 |
| TRINITY_DN89014_c1_g1_m.55677  | 1.432 | proton pump-interactor 1-like                                   |
| TRINITY_DN88375_c0_g1_m.53815  | 1.429 | acyl-CoA-binding domain-containing protein 4                    |
| TRINITY_DN87366_c0_g1_m.51370  | 1.425 | enolase 1                                                       |
| TRINITY_DN79018_c0_g1_m.39121  | 1.42  | 4-coumarate--CoA ligase-like 7 isoform X1                       |
| TRINITY_DN70734_c0_g1_m.32913  | 1.419 | calcium-dependent protein kinase 21-like                        |
| TRINITY_DN115674_c0_g1_m.4242  | 1.413 | Peroxidase superfamily protein                                  |
| TRINITY_DN26309_c0_g2_m.14758  | 1.413 | 3-hydroxyacyl-[acyl-carrier-protein] dehydratase FabZ-like      |
| TRINITY_DN7862_c0_g2_m.38713   | 1.413 | GDSL esterase/lipase CPRD49                                     |
| TRINITY_DN88557_c0_g3_m.54333  | 1.412 | malate dehydrogenase                                            |
| TRINITY_DN60144_c1_g1_m.27160  | 1.411 | thioredoxin F-type                                              |
| TRINITY_DN89203_c2_g9_m.56177  | 1.408 | probable protein phosphatase 2C 10                              |
| TRINITY_DN54558_c0_g1_m.24460  | 1.407 | catalase family protein                                         |
| TRINITY_DN57042_c0_g2_m.25711  | 1.404 | 40S ribosomal protein S18                                       |
| TRINITY_DN83035_c2_g1_m.43788  | 1.402 | peroxisomal acyl-coenzyme A oxidase 1-like                      |
| TRINITY_DN74760_c0_g1_m.35436  | 1.399 | protein GrpE isoform X2                                         |
| TRINITY_DN75998_c0_g1_m.36473  | 1.399 | protein RETICULATA-RELATED 1, chloroplastic                     |
| TRINITY_DN88419_c0_g1_m.53952  | 1.392 | subtilisin-like protease SBT1.9                                 |
| TRINITY_DN89396_c2_g2_m.56780  | 1.391 | acyltransferase-like protein                                    |
| TRINITY_DN76625_c2_g1_m.37007  | 1.39  | glutaredoxin                                                    |
| TRINITY_DN77826_c0_g1_m.37982  | 1.388 | 3-oxoacyl-[acyl-carrier-protein] synthase II                    |
| TRINITY_DN59520_c0_g1_m.26910  | 1.386 | subtilisin-like protease SBT3.3                                 |
| TRINITY_DN86833_c0_g2_m.50198  | 1.384 | probable ADP-ribosylation factor GTPase-activating protein AGD6 |
| TRINITY_DN118675_c0_g1_m.5283  | 1.383 | root FNR 2                                                      |

|                                |       |                                                                               |
|--------------------------------|-------|-------------------------------------------------------------------------------|
| TRINITY_DN80150_c0_g1_m.40313  | 1.371 | mitochondrial succinate-fumarate transporter 1                                |
| TRINITY_DN83520_c2_g1_m.44432  | 1.371 | non-specific lipid-transfer protein-like 1                                    |
| TRINITY_DN87220_c1_g1_m.51059  | 1.371 | pyruvate kinase isozyme G,<br>chloroplastic isoform X2                        |
| TRINITY_DN87662_c0_g1_m.52088  | 1.37  | putative uncharacterized protein<br>DDB_G0294196                              |
| TRINITY_DN87504_c2_g4_m.51737  | 1.368 | probable glutathione peroxidase 2                                             |
| TRINITY_DN47829_c0_g1_m.22049  | 1.367 | diacylglycerol kinase 5                                                       |
| TRINITY_DN84736_c0_g1_m.46261  | 1.367 | 4-hydroxyphenylpyruvate dioxygenase                                           |
| TRINITY_DN85023_c0_g1_m.46752  | 1.366 | 6-phosphogluconate dehydrogenase,<br>decarboxylating 1,                       |
| TRINITY_DN89674_c2_g1_m.57586  | 1.365 | translocase of chloroplast 159                                                |
| TRINITY_DN89611_c0_g1_m.57392  | 1.36  | uncharacterized protein LOC18591502                                           |
| TRINITY_DN60353_c0_g1_m.27273  | 1.355 | uncharacterized oxidoreductase SSP0419                                        |
| TRINITY_DN58106_c0_g1_m.26176  | 1.354 | pectinesterase-like                                                           |
| TRINITY_DN84291_c0_g1_m.45577  | 1.351 | Chloroplast ADP family protein                                                |
| TRINITY_DN90176_c1_g11_m.59380 | 1.344 | auxilin-related protein 2                                                     |
| TRINITY_DN82294_c0_g1_m.42827  | 1.343 | L-ascorbate oxidase homolog                                                   |
| TRINITY_DN88579_c0_g2_m.54391  | 1.343 | sulfite reductase                                                             |
| TRINITY_DN88966_c3_g1_m.55553  | 1.342 | transmembrane 9 superfamily member<br>9-like                                  |
| TRINITY_DN72781_c0_g1_m.34128  | 1.336 | peroxisome biogenesis protein 7                                               |
| TRINITY_DN78908_c1_g1_m.39005  | 1.334 | 40S ribosomal protein S14-3                                                   |
| TRINITY_DN90568_c9_g1_m.60994  | 1.333 | ATP-dependent Clp protease ATP-binding subunit ClpA homolog CD4B              |
| TRINITY_DN69975_c1_g1_m.32436  | 1.33  | uncharacterized protein LOC102611602                                          |
| TRINITY_DN74001_c0_g1_m.34921  | 1.327 | syntaxin-121-like                                                             |
| TRINITY_DN67292_c0_g1_m.30843  | 1.326 | ZDS                                                                           |
| TRINITY_DN14999_c0_g1_m.11488  | 1.325 | nifU-like protein 2                                                           |
| TRINITY_DN82527_c1_g1_m.43127  | 1.325 | vesicle-associated protein 1-2                                                |
| TRINITY_DN76971_c0_g1_m.37290  | 1.322 | uncharacterized protein LOC104415307<br>isoform X2                            |
| TRINITY_DN107409_c1_g1_m.1957  | 1.32  | mitochondrial uncoupling protein 1<br>isoform X2                              |
| TRINITY_DN84836_c1_g2_m.46430  | 1.32  | acyl-coenzyme A oxidase 2, peroxisomal<br>isoform X2                          |
| TRINITY_DN72371_c0_g1_m.33867  | 1.319 | probable xyloglucan<br>endotransglucosylase/hydrolase protein<br>B isoform X1 |
| TRINITY_DN85227_c0_g1_m.47165  | 1.316 | alpha-mannosidase-like isoform X2                                             |
| TRINITY_DN61477_c0_g1_m.27727  | 1.314 | probable mediator of RNA polymerase<br>II transcription subunit 37e           |

|                                |       |                                                                                                                                                                                                  |
|--------------------------------|-------|--------------------------------------------------------------------------------------------------------------------------------------------------------------------------------------------------|
| TRINITY_DN76958_c1_g1_m.37265  | 1.314 | malonyl-CoA-acyl carrier protein<br>transacylase, mitochondrial                                                                                                                                  |
| TRINITY_DN53600_c0_g2_m.24082  | 1.313 | probable glutathione peroxidase 2                                                                                                                                                                |
| TRINITY_DN90308_c7_g1_m.59885  | 1.31  | AMP deaminase                                                                                                                                                                                    |
| TRINITY_DN89089_c1_g1_m.55892  | 1.309 | dicarboxylate transporter 2.1                                                                                                                                                                    |
| TRINITY_DN90278_c1_g10_m.59755 | 1.307 | staphylococcal nuclease domain-<br>containing protein 1-like                                                                                                                                     |
| TRINITY_DN89295_c3_g1_m.56434  | 1.305 | bet1-like protein                                                                                                                                                                                |
| TRINITY_DN17332_c0_g1_m.12112  | 4.291 | interactor of constitutive active ROPs 1                                                                                                                                                         |
| TRINITY_DN17497_c0_g1_m.12170  | 1.841 | chitinase CHI1 precursor                                                                                                                                                                         |
| TRINITY_DN57437_c1_g1_m.25912  | 1.373 | two-on-two hemoglobin-3                                                                                                                                                                          |
| TRINITY_DN77661_c1_g1_m.37825  | 2.036 | acyl-acyl carrier protein thioesterase<br>ATL3                                                                                                                                                   |
| TRINITY_DN78828_c0_g2_m.38930  | 3.059 | ribulose biphosphate carboxylase small<br>chain clone 512-like isoform X1<br>dihydrolipoyllysine-residue<br>acetyltransferase component 4 of<br>pyruvate dehydrogenase<br>complex, chloroplastic |
| TRINITY_DN88098_c1_g18_m.53097 | 1.678 | pyruvate dehydrogenase<br>complex, chloroplastic                                                                                                                                                 |
| TRINITY_DN89492_c0_g4_m.57046  | 1.472 | uncharacterized protein C6C3.02c                                                                                                                                                                 |
| TRINITY_DN90601_c5_g11_m.61123 | 1.567 | histone deacetylase 5 isoform X1                                                                                                                                                                 |
| TRINITY_DN99185_c0_g1_m.64726  | 1.66  | non-specific lipid-transfer protein 1                                                                                                                                                            |
| TRINITY_DN88452_c0_g1_m.54040  | 1.538 | dicarboxylate transporter 1,<br>probable cinnamyl alcohol<br>dehydrogenase 1 [Ipomoea nil]                                                                                                       |
| TRINITY_DN73359_c0_g1_m.34547  | 0.769 | dehydrogenase 1 [Ipomoea nil]                                                                                                                                                                    |
| TRINITY_DN57158_c0_g1_m.25789  | 0.768 | methylthioribose kinase                                                                                                                                                                          |
| TRINITY_DN17449_c0_g1_m.12150  | 0.767 | cinnamoyl-CoA reductase 1-like                                                                                                                                                                   |
| TRINITY_DN17005_c0_g1_m.12020  | 0.766 | MLP-like protein 423 [Citrus sinensis]                                                                                                                                                           |
| TRINITY_DN84746_c0_g1_m.46294  | 0.765 | cytochrome P450 CYP82D47-like<br>probable xyloglucan                                                                                                                                             |
| TRINITY_DN80163_c0_g1_m.40327  | 0.764 | endotransglucosylase/hydrolase protein<br>6                                                                                                                                                      |
| TRINITY_DN83794_c0_g1_m.44827  | 0.764 | serine hydroxymethyltransferase,<br>mitochondrial                                                                                                                                                |
| TRINITY_DN39220_c0_g1_m.18553  | 0.762 | non-functional NADPH-dependent<br>codeinone reductase 2-like                                                                                                                                     |
| TRINITY_DN88295_c1_g1_m.53568  | 0.762 | 1-aminocyclopropane-1-carboxylate<br>oxidase homolog 1-like isoform X2                                                                                                                           |
| TRINITY_DN27524_c0_g1_m.15129  | 0.761 | pyruvate decarboxylase family protein                                                                                                                                                            |
| TRINITY_DN56794_c0_g1_m.25584  | 0.76  | light-harvesting complex I chlorophyll<br>A/B-binding protein                                                                                                                                    |
| TRINITY_DN47862_c0_g1_m.22064  | 0.759 | protein EARLY RESPONSIVE TO<br>DEHYDRATION 15                                                                                                                                                    |



|                                |       |                                                                       |
|--------------------------------|-------|-----------------------------------------------------------------------|
| TRINITY_DN71543_c0_g1_m.33401  | 0.759 | calvin cycle protein CP12-1                                           |
| TRINITY_DN81888_c1_g1_m.42237  | 0.759 | dual specificity protein phosphatase 12-like                          |
| TRINITY_DN71616_c0_g1_m.33445  | 0.751 | 7-deoxyloganetin glucosyltransferase-like                             |
| TRINITY_DN66487_c0_g1_m.30387  | 0.748 | 2-alkenal reductase (NADP(+)-dependent)                               |
| TRINITY_DN82234_c0_g1_m.42736  | 0.747 | peroxisomal (S)-2-hydroxy-acid oxidase-like isoform X1                |
| TRINITY_DN71547_c0_g1_m.33403  | 0.746 | uncharacterized protein LOC107415849                                  |
| TRINITY_DN72014_c0_g1_m.33666  | 0.746 | protein transport protein Sec61 subunit beta-like                     |
| TRINITY_DN76200_c3_g2_m.36638  | 0.745 | major latex allergen Hev b 5-like isoform X2                          |
| TRINITY_DN82977_c0_g1_m.43705  | 0.744 | geranylgeranyl diphosphate reductase, chloroplastic                   |
| TRINITY_DN83278_c0_g1_m.44077  | 0.743 | serine--glyoxylate aminotransferase                                   |
| TRINITY_DN44034_c0_g1_m.20566  | 0.742 | D-3-phosphoglycerate dehydrogenase 1                                  |
| TRINITY_DN85009_c2_g2_m.46734  | 0.742 | AtpB (chloroplast)                                                    |
| TRINITY_DN88262_c1_g3_m.53484  | 0.742 | AtpA (chloroplast)                                                    |
| TRINITY_DN58515_c2_g1_m.26419  | 0.741 | 3-oxo-Delta(4,5)-steroid 5-beta-reductase-like                        |
| TRINITY_DN86259_c0_g1_m.49099  | 0.74  | non-functional NADPH-dependent codeinone reductase 2-like             |
| TRINITY_DN39371_c0_g1_m.18628  | 0.733 | LOW QUALITY PROTEIN: photosystem II CP47 reaction center protein-like |
| TRINITY_DN69464_c0_g1_m.32085  | 0.732 | glutamine synthetase leaf isozyme, chloroplastic-like                 |
| TRINITY_DN76636_c0_g1_m.37018  | 0.732 | ATP synthase subunit delta                                            |
| TRINITY_DN85027_c0_g1_m.46763  | 0.732 | neurogenic protein mastermind                                         |
| TRINITY_DN72550_c0_g1_m.33984  | 0.731 | peroxidase 12 [Theobroma cacao]                                       |
| TRINITY_DN90549_c2_g18_m.60904 | 0.731 | photosystem II 44 kDa apoprotein                                      |
| TRINITY_DN15156_c0_g1_m.11526  | 0.73  | secoisolariciresinol dehydrogenase                                    |
| TRINITY_DN53151_c1_g3_m.23878  | 0.728 | phosphoenolpyruvate carboxylase 2                                     |
| TRINITY_DN82803_c0_g1_m.43451  | 0.726 | alkane hydroxylase MAH1-like                                          |
| TRINITY_DN85009_c2_g2_m.46735  | 0.72  | AtpE                                                                  |
| TRINITY_DN6739_c0_g2_m.30908   | 0.716 | glutamine synthetase nodule isozyme ribulose biphosphate              |
| TRINITY_DN72606_c1_g1_m.34013  | 0.716 | carboxylase/oxygenase activase 2, chloroplastic isoform X2            |
| TRINITY_DN90549_c2_g18_m.60906 | 0.714 | photosystem II protein D2                                             |
| TRINITY_DN37924_c0_g1_m.18098  | 0.713 | cytochrome P450 81E8-like                                             |
| TRINITY_DN90532_c2_g2_m.60804  | 0.713 | tubulin beta-5 chain                                                  |

|                               |       |                                                                      |
|-------------------------------|-------|----------------------------------------------------------------------|
| TRINITY_DN87997_c0_g1_m.52847 | 0.712 | LOW QUALITY PROTEIN: 65-kDa<br>microtubule-associated protein 1-like |
| TRINITY_DN80063_c0_g1_m.40213 | 0.707 | ATP synthase gamma chain                                             |
| TRINITY_DN75777_c0_g1_m.36277 | 0.706 | vestitone reductase                                                  |
| TRINITY_DN1009_c0_g1_m.369    | 0.704 | galactokinase-like, partial                                          |
| TRINITY_DN14477_c0_g1_m.11216 | 0.696 | serine--glyoxylate aminotransferase                                  |
| TRINITY_DN73897_c0_g1_m.34871 | 0.696 | ribosomal RNA small subunit<br>methyltransferase B isoform X2        |
| TRINITY_DN87913_c1_g3_m.52658 | 0.696 | photosystem II protein D1                                            |
| TRINITY_DN73642_c0_g1_m.34724 | 0.69  | homeobox protein knotted-1-like LET12                                |
| TRINITY_DN82941_c2_g1_m.43656 | 0.69  | probable nucleoredoxin 1                                             |
| TRINITY_DN81470_c0_g1_m.41724 | 0.68  | GEM-like protein 5                                                   |
| TRINITY_DN89876_c3_g5_m.58343 | 0.679 | protein argonaute 4-like                                             |
| TRINITY_DN87913_c3_g1_m.52661 | 0.676 | F-box/kelch-repeat protein                                           |
| TRINITY_DN79990_c1_g1_m.40133 | 0.668 | uncharacterized protein LOC18597726                                  |
| TRINITY_DN22594_c0_g1_m.13753 | 0.665 | abscisic stress-ripening protein 2-like                              |
| TRINITY_DN88369_c1_g1_m.53784 | 0.665 | uncharacterized protein LOC102617553                                 |
| TRINITY_DN47340_c0_g1_m.21834 | 0.644 | inorganic phosphate transporter 1-4-like                             |
| TRINITY_DN30050_c0_g1_m.15940 | 0.643 | PSI reaction center subunit II                                       |
| TRINITY_DN73519_c0_g1_m.34656 | 0.606 | random slug protein 5                                                |
| TRINITY_DN47249_c0_g1_m.21785 | 0.598 | 3-ketoacyl-CoA synthase 6                                            |
| TRINITY_DN133567_c0_g1_m.9673 | 0.583 | photosystem I P700 apoprotein A1<br>(mitochondrion)                  |
| TRINITY_DN78951_c0_g1_m.39057 | 0.565 | Chlorophyll a-b binding protein                                      |
| TRINITY_DN64844_c0_g1_m.29477 | 0.551 | fruit protein pKIWI501-like                                          |
| TRINITY_DN47392_c0_g1_m.21858 | 0.546 | major allergen Pru av 1                                              |

**Proteins that were differentially regulated in BABA+ compared to Water+ at 4 d**

| Protein ID                    | BABA+/Con<br>trol+ ratio | Description                                                                               |
|-------------------------------|--------------------------|-------------------------------------------------------------------------------------------|
| TRINITY_DN107402_c5_g9_m.1948 | 1.445                    | glutathione S-transferase                                                                 |
| TRINITY_DN115219_c0_g1_m.3996 | 1.631                    | pectate lyase 8                                                                           |
| TRINITY_DN120408_c0_g1_m.5753 | 0.763                    | aconitase 1                                                                               |
| TRINITY_DN123185_c0_g1_m.6356 | 1.325                    | linoleate 9S-lipoxygenase 5 isoform X1                                                    |
| TRINITY_DN128711_c0_g1_m.8241 | 1.408                    | ATP-dependent RNA helicase                                                                |
| TRINITY_DN13748_c0_g2_m.10654 | 1.58                     | ferredoxin-like                                                                           |
| TRINITY_DN17332_c0_g1_m.12112 | 2.055                    | interactor of constitutive active ROPs 1                                                  |
| TRINITY_DN17497_c0_g1_m.12170 | 1.888                    | chitinase CHI1 precursor                                                                  |
| TRINITY_DN2179_c1_g2_m.13399  | 2.093                    | tropinone reductase                                                                       |
| TRINITY_DN42530_c0_g1_m.19874 | 1.319                    | dihydrolipoyllysine-residue<br>acetyltransferase component 5 of<br>pyruvate dehydrogenase |
| TRINITY_DN45670_c0_g2_m.21100 | 1.527                    | thaumatin-like protein 1b                                                                 |
| TRINITY_DN57437_c1_g1_m.25912 | 1.307                    | two-on-two hemoglobin-3                                                                   |

|                                |       |                                                                           |
|--------------------------------|-------|---------------------------------------------------------------------------|
| TRINITY_DN59104_c1_g1_m.26704  | 1.301 | metal tolerance protein 1                                                 |
| TRINITY_DN59136_c1_g1_m.26718  | 1.721 | methionine gamma-lyase                                                    |
| TRINITY_DN59793_c0_g1_m.27015  | 1.599 | pathogenesis-related protein PR-4                                         |
| TRINITY_DN63773_c0_g1_m.28928  | 1.47  | 21 kDa protein                                                            |
| TRINITY_DN64099_c0_g1_m.29113  | 1.593 | 21 kDa protein-like                                                       |
| TRINITY_DN67300_c0_g1_m.30848  | 1.351 | uncharacterized protein                                                   |
| TRINITY_DN71076_c0_g1_m.33143  | 1.347 | 3-glucanase family protein                                                |
| TRINITY_DN72717_c1_g1_m.34085  | 1.396 | pathogenesis-related protein STH-2-like                                   |
| TRINITY_DN73690_c2_g2_m.34754  | 1.594 | MLP-like protein 28                                                       |
| TRINITY_DN74586_c0_g1_m.35299  | 0.738 | nudix hydrolase 23                                                        |
| TRINITY_DN77661_c1_g1_m.37825  | 1.437 | acyl-acyl carrier protein thioesterase<br>ATL3                            |
| TRINITY_DN78828_c0_g2_m.38930  | 2.439 | ribulose biphosphate carboxylase small<br>chain clone 512-like isoform X1 |
| TRINITY_DN80848_c0_g1_m.41073  | 1.476 | polyphenol oxidase<br>xyloglucan                                          |
| TRINITY_DN81085_c2_g1_m.41339  | 1.689 | endotransglucosylase/hydrolase protein<br>31-like                         |
| TRINITY_DN81181_c0_g1_m.41418  | 1.303 | UPF0183 protein                                                           |
| TRINITY_DN8225_c0_g2_m.42771   | 1.531 | thaumatin-like protein 1                                                  |
| TRINITY_DN82403_c0_g1_m.42966  | 1.326 | splicing factor 3A subunit 2-like                                         |
| TRINITY_DN82552_c0_g2_m.43165  | 1.422 | stearoyl-[acyl-carrier-protein] 9-<br>desaturase                          |
| TRINITY_DN85683_c1_g2_m.47945  | 1.641 | basic endochitinase CHB4-like                                             |
| TRINITY_DN85683_c1_g9_m.47946  | 1.387 | chitinase 4-like isoform X1<br>dihydrolipoyllysine-residue                |
| TRINITY_DN88098_c1_g18_m.53097 | 1.388 | acetyltransferase component 4 of<br>pyruvate dehydrogenase                |
| TRINITY_DN88629_c1_g5_m.54539  | 1.313 | phosphoglycerate mutase-like protein 1<br>isoform X1                      |
| TRINITY_DN88838_c3_g2_m.55174  | 1.348 | protein DMR6-LIKE OXYGENASE 2<br>isoform X1                               |
| TRINITY_DN89290_c0_g1_m.56412  | 1.317 | stem-specific protein TSJT1                                               |
| TRINITY_DN89492_c0_g4_m.57046  | 1.358 | uncharacterized protein                                                   |
| TRINITY_DN90071_c1_g1_m.58993  | 1.573 | L-cysteine desulfhydrase                                                  |
| TRINITY_DN90601_c5_g11_m.61123 | 1.447 | histone deacetylase 5 isoform X1                                          |
| TRINITY_DN99185_c0_g1_m.64726  | 1.422 | non-specific lipid-transfer protein 1                                     |
| TRINITY_DN99251_c0_g2_m.64789  | 1.56  | glutathione S-transferase                                                 |
| TRINITY_DN66394_c0_g1_m.30352  | 1.557 | expansin-B15-like                                                         |
